# Supplementary material for: The Effect of Surface Coating of Iron Oxide Nanoparticles on Magnetic Resonance Imaging Relaxivity
Source: Frontiers journal article supplement (doi:10.3389/fnano.2021.644734), 2021-04-20
Supplement: Data_Sheet_1.docx [file Data_Sheet_1.docx]

**The Effect of Surface Coating of Iron Oxide Nanoparticles on Magnetic Resonance Imaging Relaxivity**

Fatemeh Ahmadpoor1, Atif Masoud2, Neus Feliu3,4, Wolfgang J. Parak4, Seyed Abbas Shojaosadati5*

1 Department of Materials Engineering, Tarbiat Modares University, Tehran, Iran, f.ahmadpoor@modares.ac.ir

2 Karachi Institute of Radiotherapy and Nuclear Medicine, Karachi, Pakistan, atif_cancer@hotmail.com

3 Fraunhofer Center for Applied Nanotechnology (CAN), Hamburg, Germany, [nfeliu@physnet.uni-hamburg.de](mailto:nfeliu@physnet.uni-hamburg.de)

4 Fachbereich Physik and CHyN, Universität Hamburg, 22607 Hamburg, Germany, wolfgang.parak@uni-hamburg.de

5 Biotechnology Group, Faculty of Chemical Engineering, Tarbiat Modares University, Tehran, Iran, shoja_sa@modares.ac.ir

*****Correspondence: shoja_sa@modares.ac.ir

**Supporting Information**





Figure SI-1: X-ray diffraction spectrum of IONPs with dc = 6 nm given as intensity in dependence of the scattering angle 2Θ.





Figure SI-2: Magnetization M in dependence of the applied field H, as recorded for IONPs with dc = 6nm.





Figure SI-3: Fourier-transformed IR spectrum of IONPs with dc = 6 nm showing the transmission T in dependence of the wavenumber.
